# Supplementary material
Source: MDPI journal article supplement (https://www.mdpi.com/2075-163X/12/9/1115)
Supplement: s1 [file s1]

Archive with 3 entries (3 files):
- Supplementary Materials-Figures.pdf
- Table S1 Lab generated sample results.xlsx
- Table S2 RCMD sample results.xlsx
