# Supplementary material
Source: MDPI journal article supplement (https://www.mdpi.com/2075-163X/12/9/1115)
Supplement: s1 [file s1 › Table S1 Lab generated sample results.xlsx]

## Sheet: Table S1. Lab sample results
Table S1. SEM-EDX, FTIR and NMAM 7603 results for respirable dust samples generated from source materials.
Mine	Mine Region1	Source Material2	SEM-EDX		Dust	FTIR5	NMAM 76036
			PLD3	Silica	mass4	Quartz
			(#/µm2)	mass (%)	(mg)	mass (%)
10	CA	BD	0.011	16.5	0.99	18.2	9.2
10	CA	RS	0.017	8.3	1.11	15	4.9
11	CA	RS	0.035	6.4	1.24	18.8	12.4
11	CA	RD	0.003	0	1.04		n/a
12	CA	RS	0.017	15.2	1.05	13.1	8.3
12	CA	C	0.009	10	1.05	9	5.1
12	CA	RD	0.001	0	0.93		n/a
13	CA	BD	0.004	24.1	1.02	38	13.7
13	CA	C	0.011	2	1.13	0.8	0
13	CA	RD	0.019	0	1.05		n/a
14	CA	BD	0.014	17.8	1.03	11.3	8.8
14	CA	RS	0.024	12.7	1.12	19.7	11
14	CA	C	0.003	3.7	0.92	0.6	n/a
14	CA	RD	0.002	0.3	0.89		n/a
15	CA	RS	0.007	17.3	1.2	13.7	9.7
15	CA	C	0.002	8.3	0.96	2.9	1.1
15	CA	RD	0.001	0.2	1.62		n/a
16	NA	BD	0.018	41.1	1.14	49.8	27.9
16	NA	C	0.006	6.1	1.14	3.8	1
16	NA	RD	0.004	0.3	0.86	0.5	n/a
17	NA	BD	0.014	34.5	1.21	24.1	18.8
17	NA	C	0.002	1.6	0.82	0.3	n/a
17	NA	RD	0.004	0.5	1.1	0.1	n/a
18	NA	BD	0.007	19.7	0.99	30.9	11.6
18	NA	RS	0.005	8	1.94	18.6	13.1
18	NA	C	0.002	4.3	0.88	2.7	0
18	NA	RD	0.018	0	0.83		n/a
19	MW	BD	0.009	5.9	0.92	15.3	11
19	MW	RS	0.014	35.1	1.01	14.2	10.9
19	MW	C	0.009	10.3	0.8		0.8
19	MW	RD	0.021	0	0.81	5.2	1.2
20	MW	BD	0.007	3.2	1.17	4.2	2.5
20	MW	RD	0.01	0	1.08	0.1	n/a
21	CA	BD	0.004	8.8	1.19	22.5	9.2
21	CA	RS	0.002	10.9	0.73	19.1	14.3
21	CA	C	0.003	7.6	1.05	0.5	0
22	CA	BD	0.003	15.1	0.6	20.5	9.3
22	CA	RS	0.002	14.4	0.84	13.6	11.2
22	CA	C	0.002	6.7	0.95	2.9	2.4
22	CA	RD	0.008	0.1	0.93		n/a
23	W	BD	0.004	15	1.02	25.9	7.9
23	W	RS	0.013	20.6	0.83	38	13.9
23	W	C	0.003	4.5	0.89	0.4	n/a
23	W	RD	0.009	0.1	0.87		n/a
24	W	BD	0.014	75.3	0.85	70.3	37.1
24	W	RD	0.005	0	0.96	1.3	n/a
1 Mine region: CA=central Appalachia; NA=northern Appalachia; MW=mid-west; W=west
2 Source material: BD=bolter dust; RS=run-of-mine (ROM) rock strata; RD=rock dust; C= ROM coal
3 PLD: Particle loading density=number of particles/analyzed area (#/µm2)
4 Dust mass (mg)=dust mass on PVC filter
5 Empty cells indicate quartz mass < LOD=3.74µg (=0.026/0.00695, Integrated peak area/calibration factor for lab generated samples in two-piece cassette)
6 n/a denotes the sample was not analyzed by NMAM 7603.
