# Supplementary material
Source: MDPI journal article supplement (https://www.mdpi.com/2075-163X/12/9/1115)
Supplement: s1 [file s1 › Table S2 RCMD sample results.xlsx]

## Sheet: Table S2. RCMD sample results
Table S2. SEM-EDX, FTIR and NMAM 7603 results for RCMD samples.
Mine	Mine Region1	Sampling Location2	SEM-EDX		Dust	FTIR5	NMAM 76036
			PLD3	Silica	mass4	Quartz
			(#/µm2)	mass (%)	(mg)	mass (%)
10	CA	B	0.032	5.8	0.148		n/a
10	CA	B	0.051	3.7	0.181		n/a
10	CA	P	0.055	0	1.494		n/a
10	CA	R	0.009	8	0.038		n/a
10	CA	F	0.006	8.3	0.132		n/a
10	CA	F	0.031	0.9	0.183		n/a
10	CA	I	0.001	44.6	0.005		n/a
11	CA	B	0.025	14.2	0.106		n/a
11	CA	P	0.032	0.2	1.153	6.2	n/a
11	CA	R	0.034	0.5	0.749	6.7	9.4
11	CA	F	0.003	11.6	0.164		n/a
12	CA	B	0.005	4.3	0.103		n/a
12	CA	P	0.037	2.8	1.077	4	n/a
12	CA	R	0.036	0.4	0.649	3.2	7.1
12	CA	I	0.002	5.9	0.054		n/a
13	CA	B	0.046	0.3	2.535	12.3	11.5
13	CA	R	0.027	4	1.297	1.8	3.5
13	CA	R	0.047	0	7.347	4.7	n/a
13	CA	F	0.028	1.2	0.189		n/a
13	CA	I	0.009	1.4	0.035		n/a
13	CA	I	0.026	7.1	0.701	4.6	3.7
14	CA	B	0.002	16.9	0.039		n/a
14	CA	P	0.037	0	4.348	7.3	8.9
14	CA	F	0.031	13.4	0.187		n/a
14	CA	I	0.003	8.8	0.002		n/a
15	CA	B	0.006	22.7	0.145		n/a
15	CA	P	0.015	12	0.47	4.1	9.7
15	CA	R	0.018	11.5	0.351	5.1	10.3
15	CA	F	0.005	4.8	0.028		n/a
15	CA	I	0.0002	0	0.001		n/a
16	NA	B	0.007	4.4	0.089		n/a
16	NA	P	0.037	9.9	0.221		n/a
16	NA	R	0.014	4.4	0.172		n/a
16	NA	F	0.021	2.6	0.073		n/a
17	NA	B	0.017	17.8	0.043		n/a
17	NA	P	0.043	0.6	0.277		n/a
17	NA	R	0.02	1	0.489		n/a
17	NA	R	0.056	0.2	0.763	1.9	5.4
17	NA	I	0.003	1.9	0.016		n/a
17	NA	I	0.005	3.9	0.072		n/a
18	NA	B	0.008	8.1	0.096		n/a
18	NA	P	0.05	2.7	0.34		n/a
18	NA	R	0.024	6.7	0.231		n/a
18	NA	F	0.003	4.4	0.018		n/a
18	NA	I	0.001	1.1	0.002		n/a
19	MW	B	0.046	6.8	0.181		n/a
19	MW	P	0.038	3.6	0.277		n/a
19	MW	R	0.044	4.2	0.223		n/a
19	MW	R	0.045	3.2	0.299		n/a
19	MW	F	0.028	10.5	2.608	4.6	6.2
19	MW	I	0.006	4.9	0.014		n/a
20	MW	B	0.048	0.3	0.53		n/a
20	MW	P	0.049	0.3	0.758	0.5	n/a
20	MW	R	0.04	2.9	0.577		n/a
20	MW	F	0.005	9.1	0.143		n/a
20	MW	F	0.049	6.1	0.191		n/a
20	MW	I	0.002	3.5	0.019		n/a
21	CA	B	0.02	15.1	0.085		n/a
21	CA	P	0.043	0	1.415	5.2	6.9
21	CA	R	0.044	0.1	0.557	4.4	n/a
21	CA	F	0.013	11.6	0.089		n/a
21	CA	I	0.023	9.9	0.063		n/a
22	CA	P	0.042	0.8	1.23	7	11.4
22	CA	F	0.004	5.6	0.018		n/a
22	CA	I	0.002	9.8	0.003		n/a
23	W	P	0.028	0.1	0.349		n/a
23	W	R	0.047	0.1	0.888		n/a
23	W	I	0.016	0	0.097		n/a
23	W	I	0.028	0.9	0.176		n/a
24	W	R	0.032	19.7	0.165		n/a
24	W	R	0.051	0	5.361	3.5	4.5
24	W	F	0.015	5.7	0.068		n/a
24	W	I	0.012	5.7	0.052		n/a
24	W	I	0.011	4.5	0.063		n/a
24	W	I	0.051	94.9	1.547	24.9	58.1
1 Mine region: CA=central Appalachia; NA=northern Appalachia; MW=mid-west; W=west
2 Sampling location: I=intake; R=return; P=production; B=roof bolter; F=feeder breaker
3 PLD: Particle loading density=number of particles/analyzed area (#/µm2)
4 Dust mass (mg)=dust mass on PVC filter
5 Empty cells indicate quartz mass < LOD=4.31 µg (=0.026/0.00604, Integrated peak area/calibration factor for mine samples in two-piece cassette)
6 n/a denotes the sample was not analyzed by NMAM 7603.
